# Supplementary material for: Ternary complex of Kif2A-bound tandem tubulin heterodimers represents a kinesin-13-mediated microtubule depolymerization reaction intermediate
Source: PubMed Central journal article supplement (PMC6035175; doi:10.1038/s41467-018-05025-7), 2018-07-06
Supplement: 41467_2018_5025_MOESM1_ESM.pdf [file 41467_2018_5025_MOESM1_ESM.pdf]

**Ternary complex of Kif2A-bound tandem tubulin heterodimers represents a kinesin-13-mediated microtubule depolymerization reaction intermediate**

Trofimova et al.

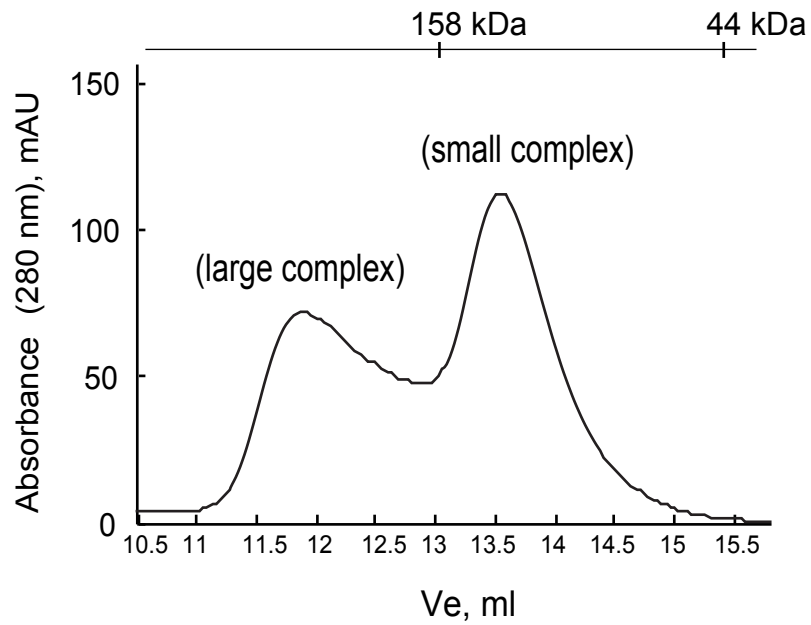

**Supplementary Figure 1. Kif2A-NM-tubulin-DARPin small complex rearranges to large complex upon concentration.** Fractions corresponding to the small complex of Kif2A-NM-tubulin-DARPin were concentrated 10-fold, and incubated for 30 min, and then re-run on the S200 10/300 GL column in HEPES buffer.

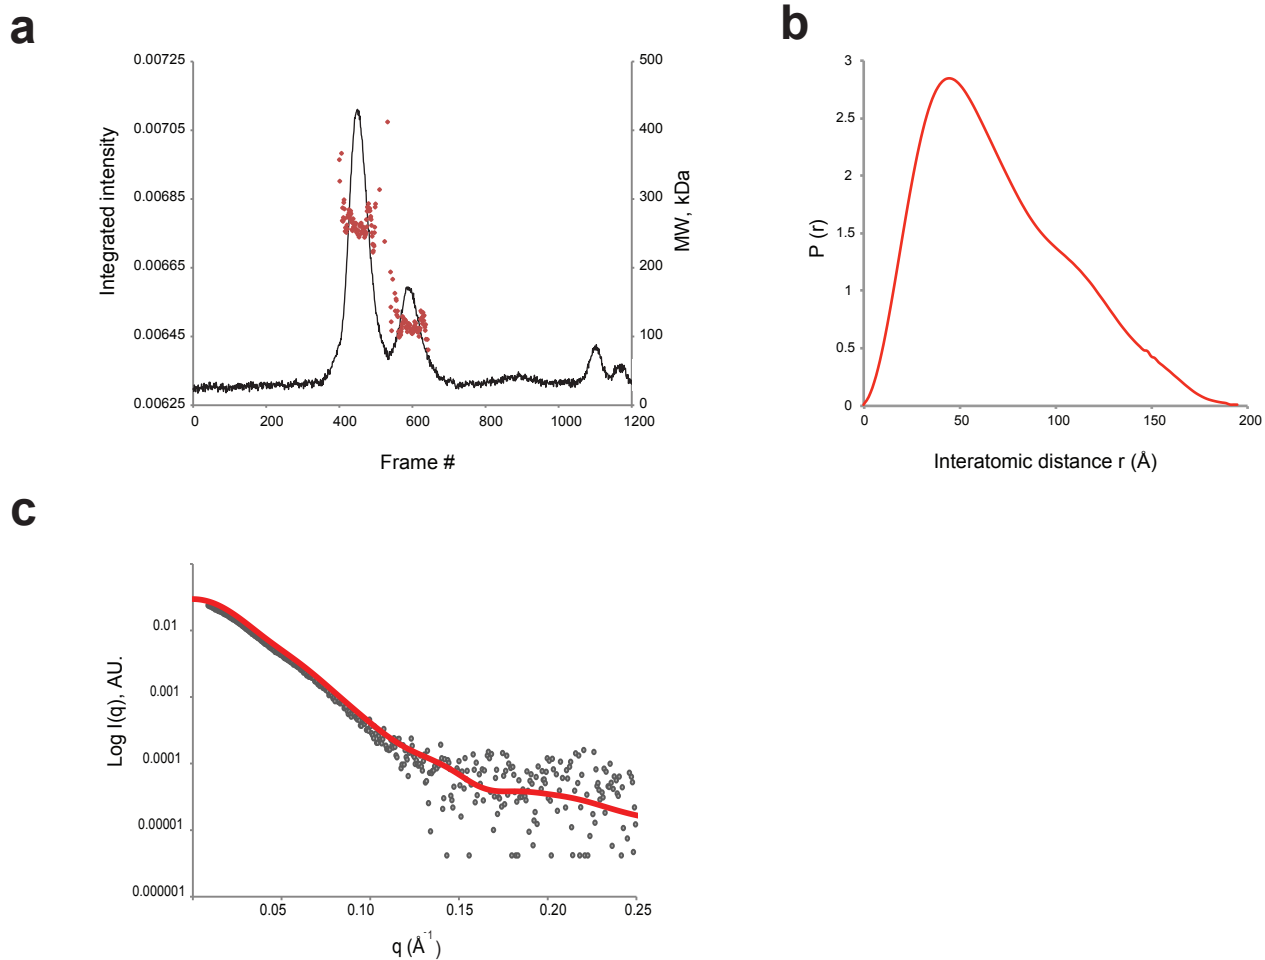

**Supplementary Figure 2. SAXS analysis of the Kif2A-NM-tubulin-DARPin complex.** (a) SEC-SAXS elution profile of Kif2A-NM-tubulin-DARPin mixture. Integrated intensity (black line) and the corresponding molecular weight correlations (red diamonds) were plotted across the elution peaks. (b) Pair-distance ( $r$ ) probability distribution computed from the experimental SAXS data for frames 433-473 by ATSAS. (c) CRY SOL comparison of the experimental scattering for the 1:2:1 Kif2A-NM-tubulin-DARPin complex (gray circles) with the simulated scattering profile from the Kif2A-NM-tubulin-DARPin crystal structure (red line).

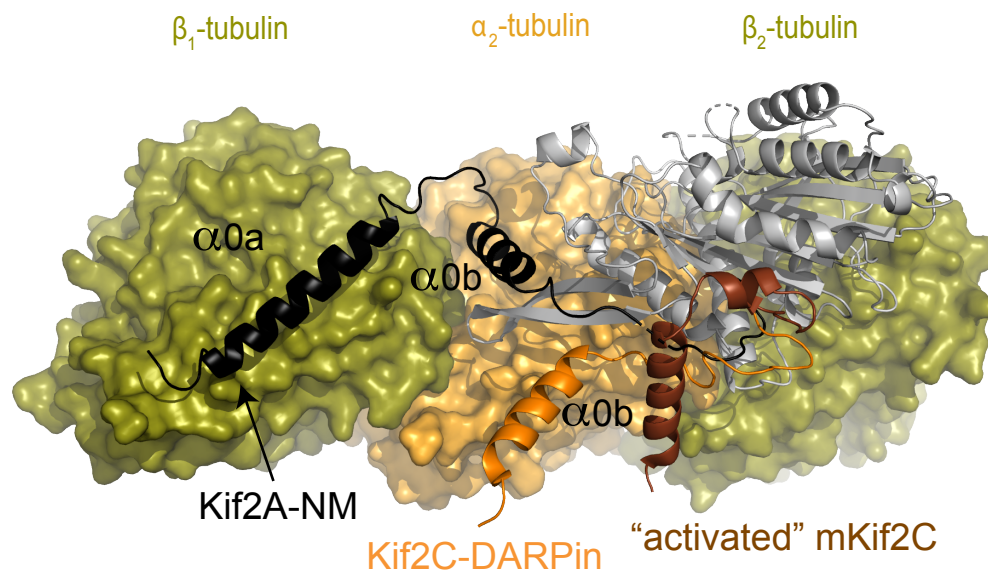

**Supplementary Figure 3. Conformations of the neck helices of kinesin-13 proteins observed in crystal structures.** Motor domain of Kif2A is represented in grey. The neck parts of Kif2A-NM-tubulin-DARPin complex,  $\alpha_0a$  and  $\alpha_0b$ , are in black.  $\alpha_0b$  of Kif2C-tubulin-DARPin complex (PDB ID: 5MIO) is in orange and  $\alpha_0b$  of the "activated conformation" of mKif2C (PDB ID: 5XJA) is in brown. Tubulin is shown as a surface representation.

Tubulin-bound Kif2A  
Isolated hKif2A (2GRY)  
“activated” mKif2C (5XJB)

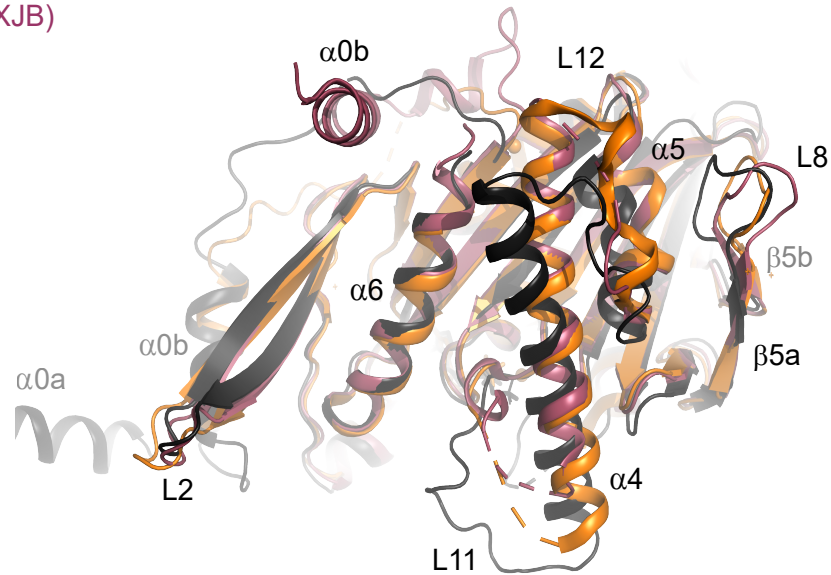

**Supplementary Figure 4. Conformations of the Kif2A motor domain relative to “activated” Kif2C.** The motor domain of tubulin-bound Kif2A-NM (black) is superimposed on isolated ADP-Kif2A (orange) and the mKif2Ccore:ADP-BeFx structure (maroon) via the P-loop. The r.m.s.d. for 94 equivalent C $\alpha$  positions in 5XJA is 3.63 Å, and the r.m.s.d. for 97 equivalent C $\alpha$  positions in 5XJB is 3.59 Å. Proteins are viewed from tubulin surface.

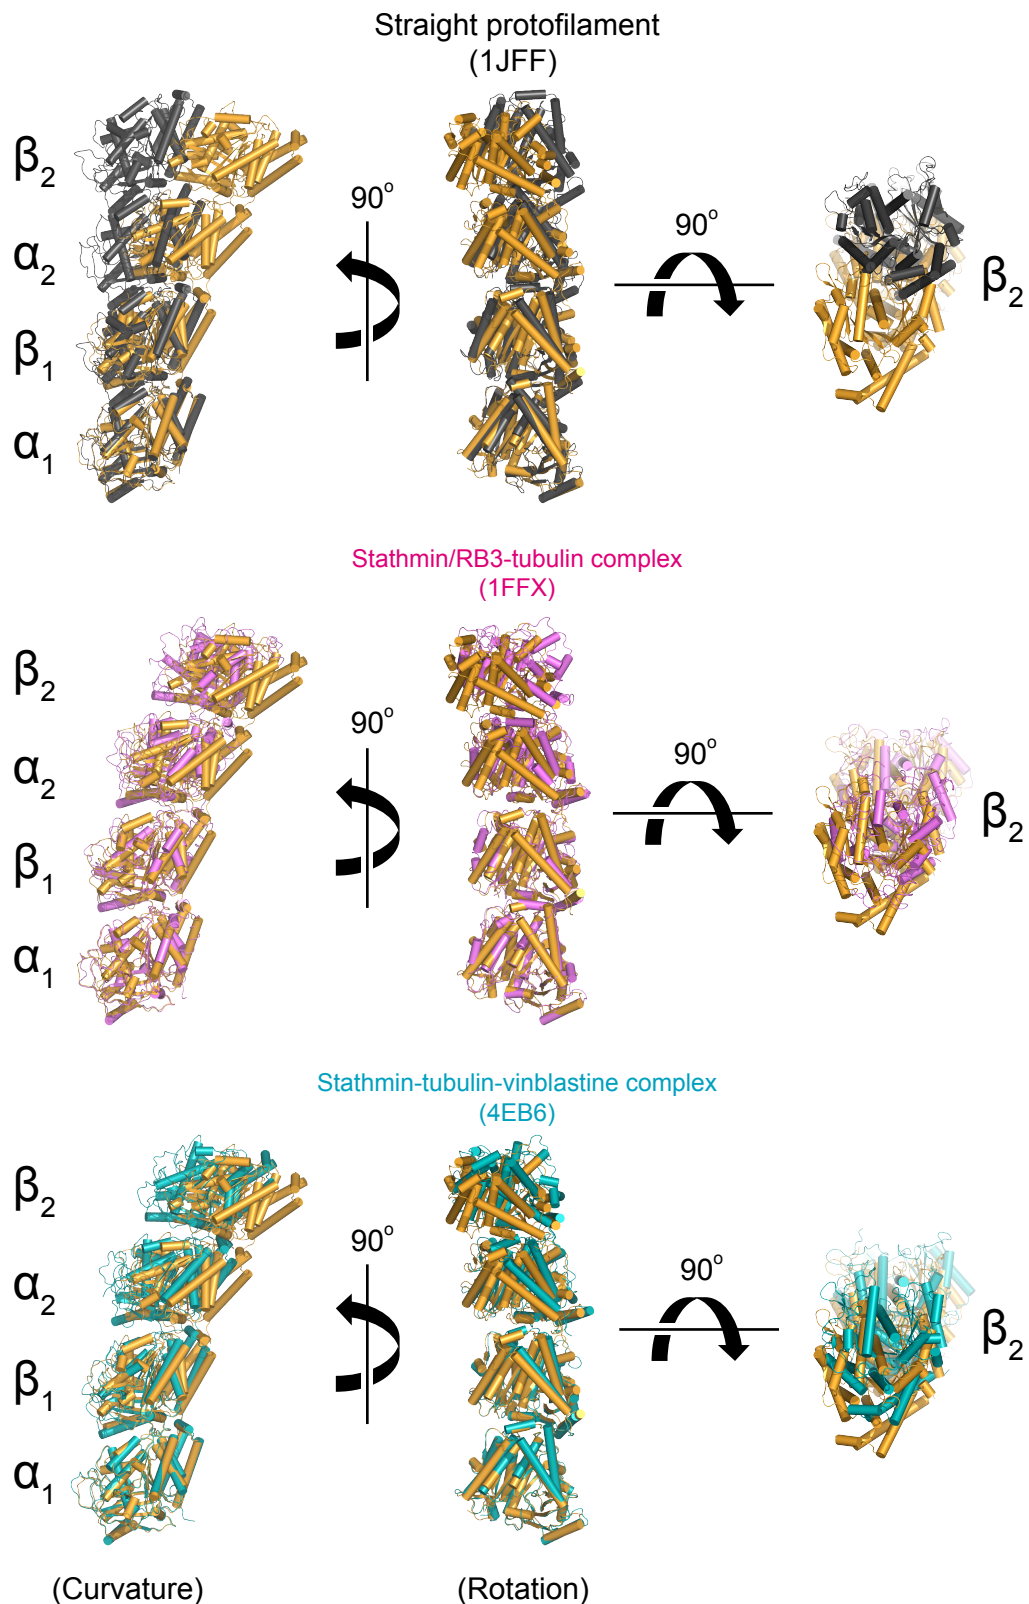

**Supplementary Figure 5. Curvature and rotational displacement of tubulin complexes.**

Views are from the side (left), looking from the outer surface of the protofilament, into the luminal space (middle), and looking into the long axis of the protofilament from the plus-end (right). Superposition was performed using the  $\alpha_1$ -tubulin subunit of each complex. Tubulin subunits of the Kif2A-NM-tubulin-DARPin complex are coloured orange.

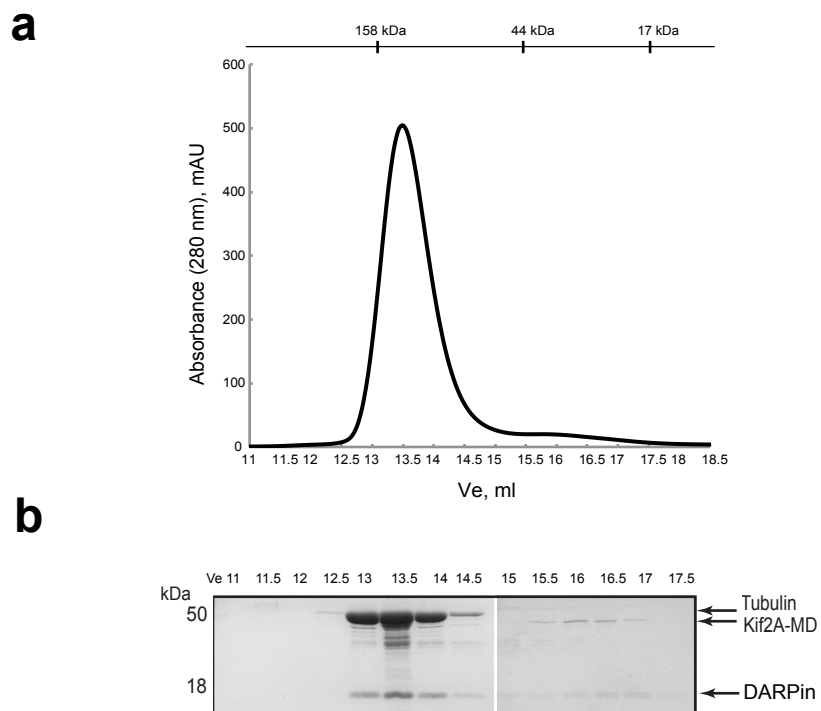

**Supplementary Figure 6. Kif2A-MD forms a complex with tubulin in the presence of AMPPNP . (a)** Size- exclusion chromatography (SEC) profile of Kif2A-MD-tubulin-DARPin (1:1:1.05 molar ratio) supplemented with 1 mM AMPPNP in HEPES buffer. **(b)** 12% SDS-PAGE gel of SEC fractions from the above experiment. Molecular weight of Kif2A-MD = 42 kDa, tubulin = 50 kDa, and DARPin = 18 kDa

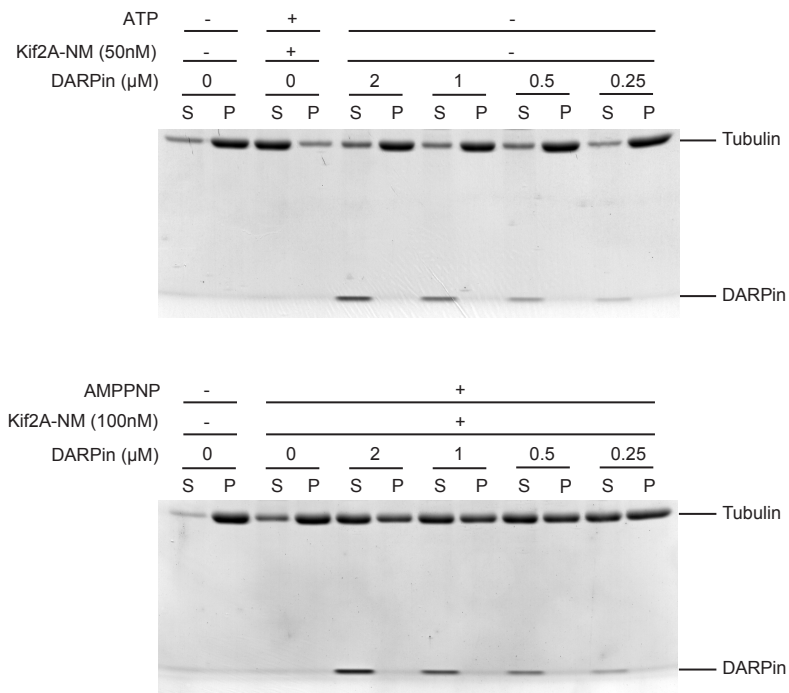

**Supplementary Figure 7. Level of MT depolymerization in the presence of varying amounts of DARPin without (upper gel) or with Kif2A-NM (lower gel).** The samples were processed as in Figure 7 and evaluated by MT sedimentation assay and coomassie blue stained gels.



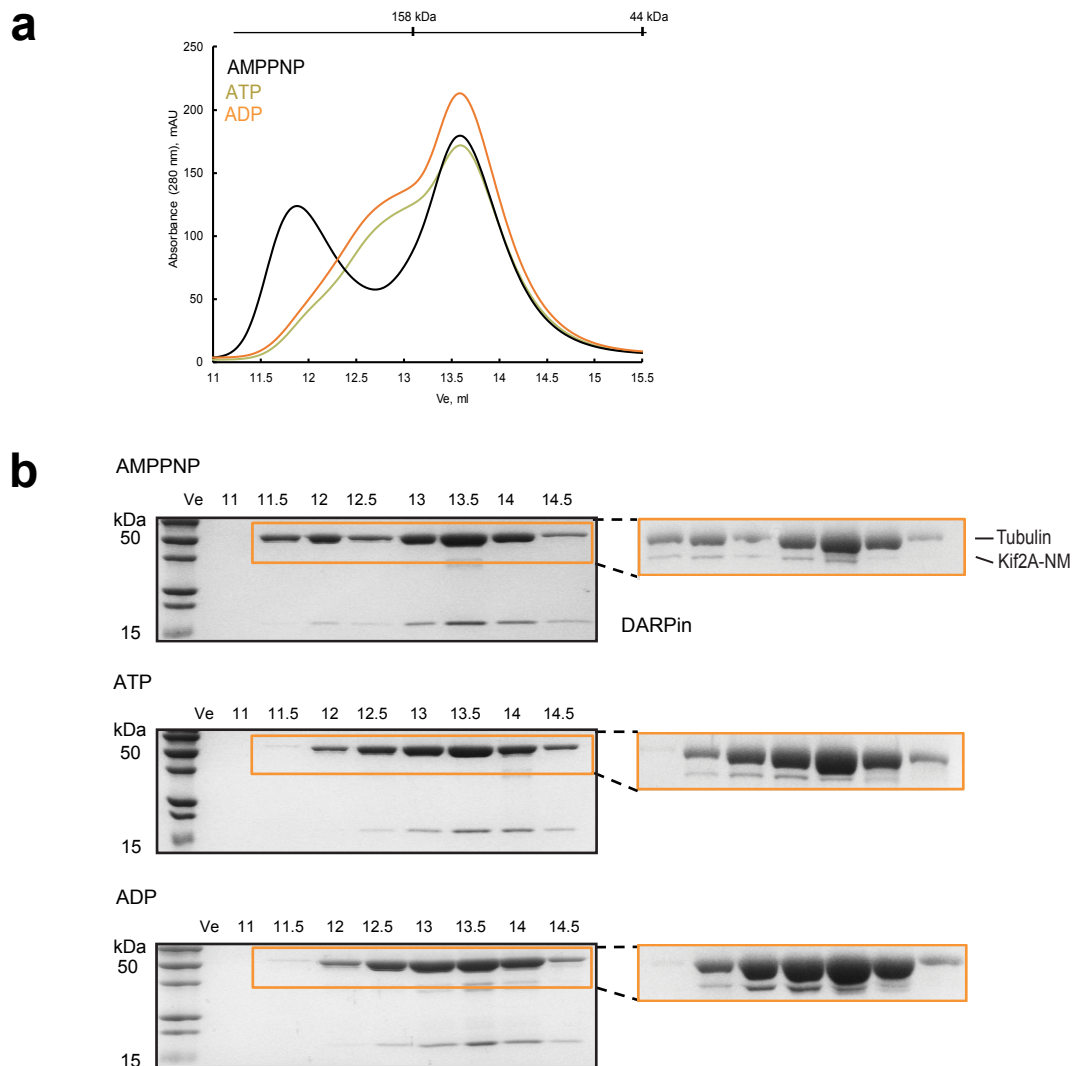

**Supplementary Figure 8. Kif2A-NM-tubulin-DARPin complexes formed in the presence of different nucleotides. (a)** Size-exclusion chromatography (SEC) profiles of Kif2A-NM-tubulin-DARPin complexes (0.5:1:1.05 molar ratio) supplemented with 0.1 mM ATP (green), ADP (orange), and AMPPNP (black) separated on a S 200 10/300 GL column in HEPES buffer. **(b)** 12% SDS-PAGE gels of SEC fractions from the above experiments. Molecular weight of Kif2A-NM = 48 kDa, tubulin = 50 kDa and DARPin = 18 kDa. Insets show Kif2A-NM-tubulin-DARPin fractions resolved on 10% SDS-PAGE gels.

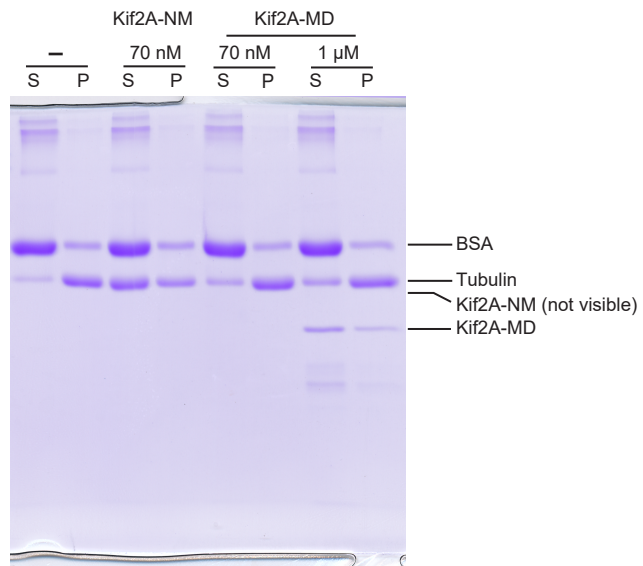

**Supplementary Figure 9. Uncropped gel of Figure 1b**

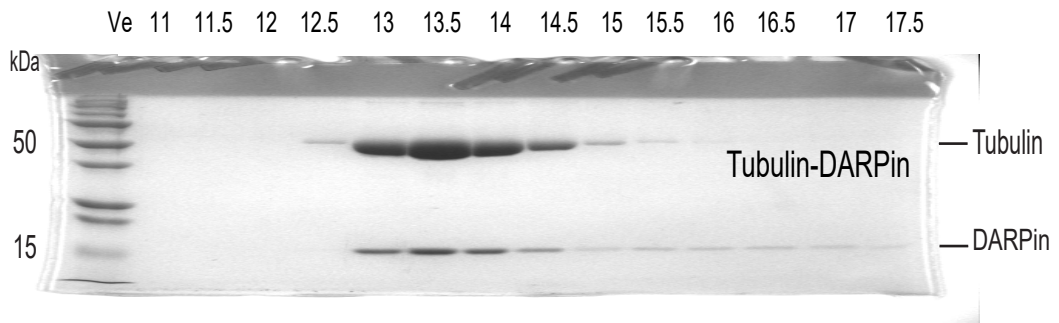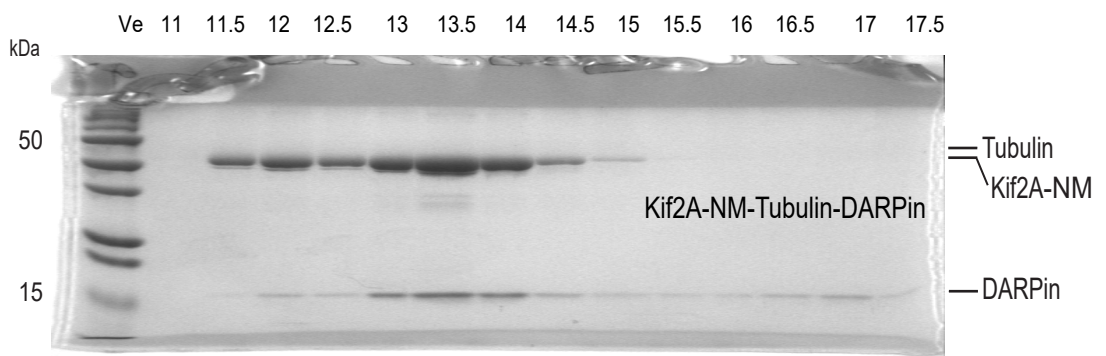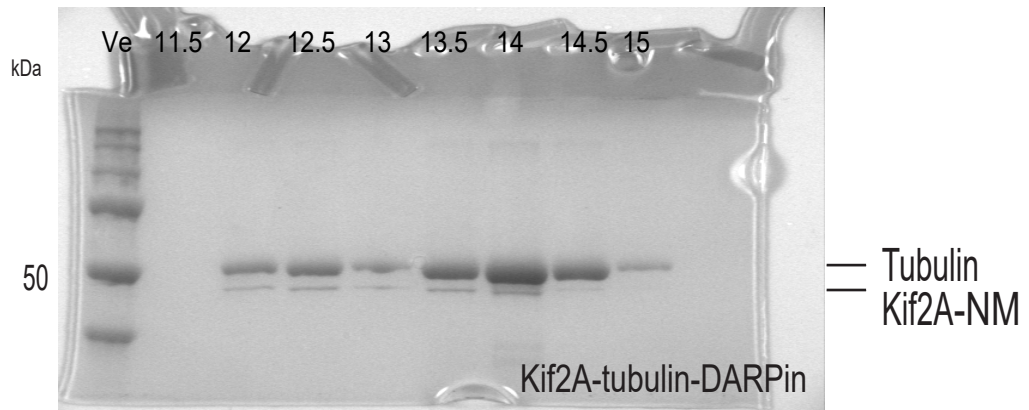

**Supplementary Figure 10. Uncropped gels of Figure 1d**

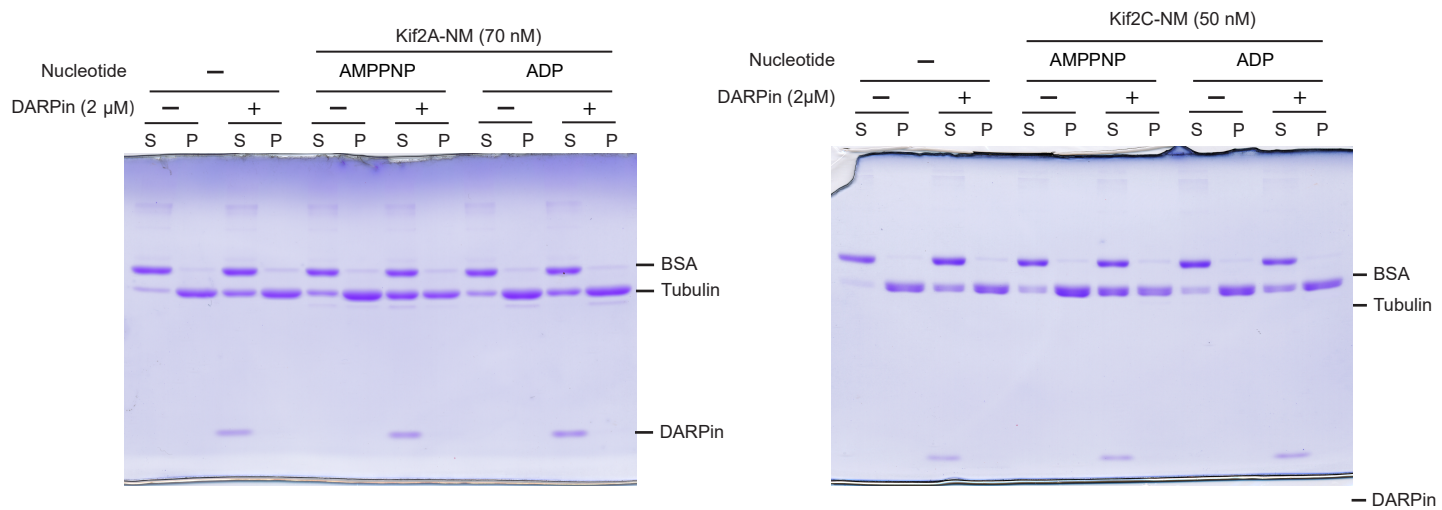

Supplementary Figure 11. Uncropped gels of Figure 7a and 7b

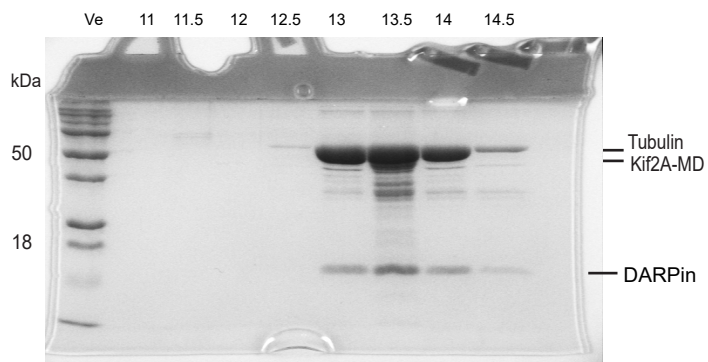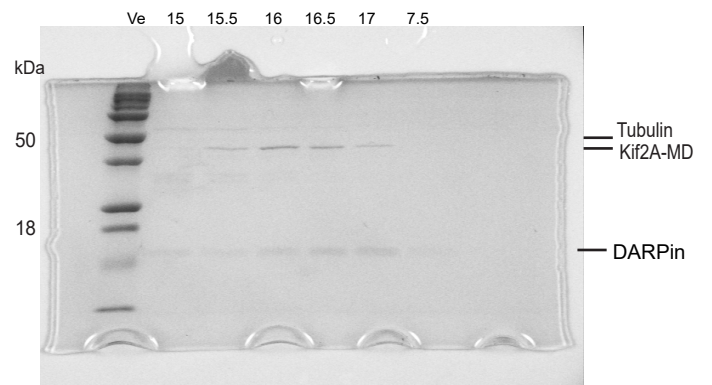

**Supplementary Figure 12. Uncropped gels of Supplementary Figure 6**

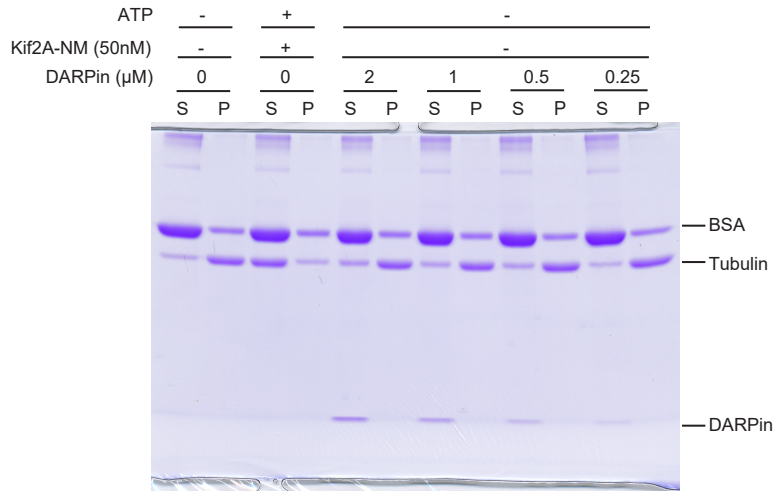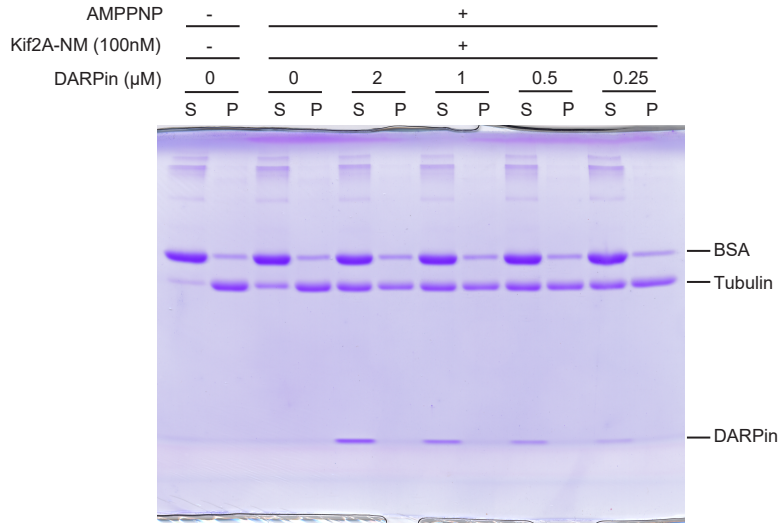

Supplementary Figure 13. Uncropped gels of Supplementary Figure 7

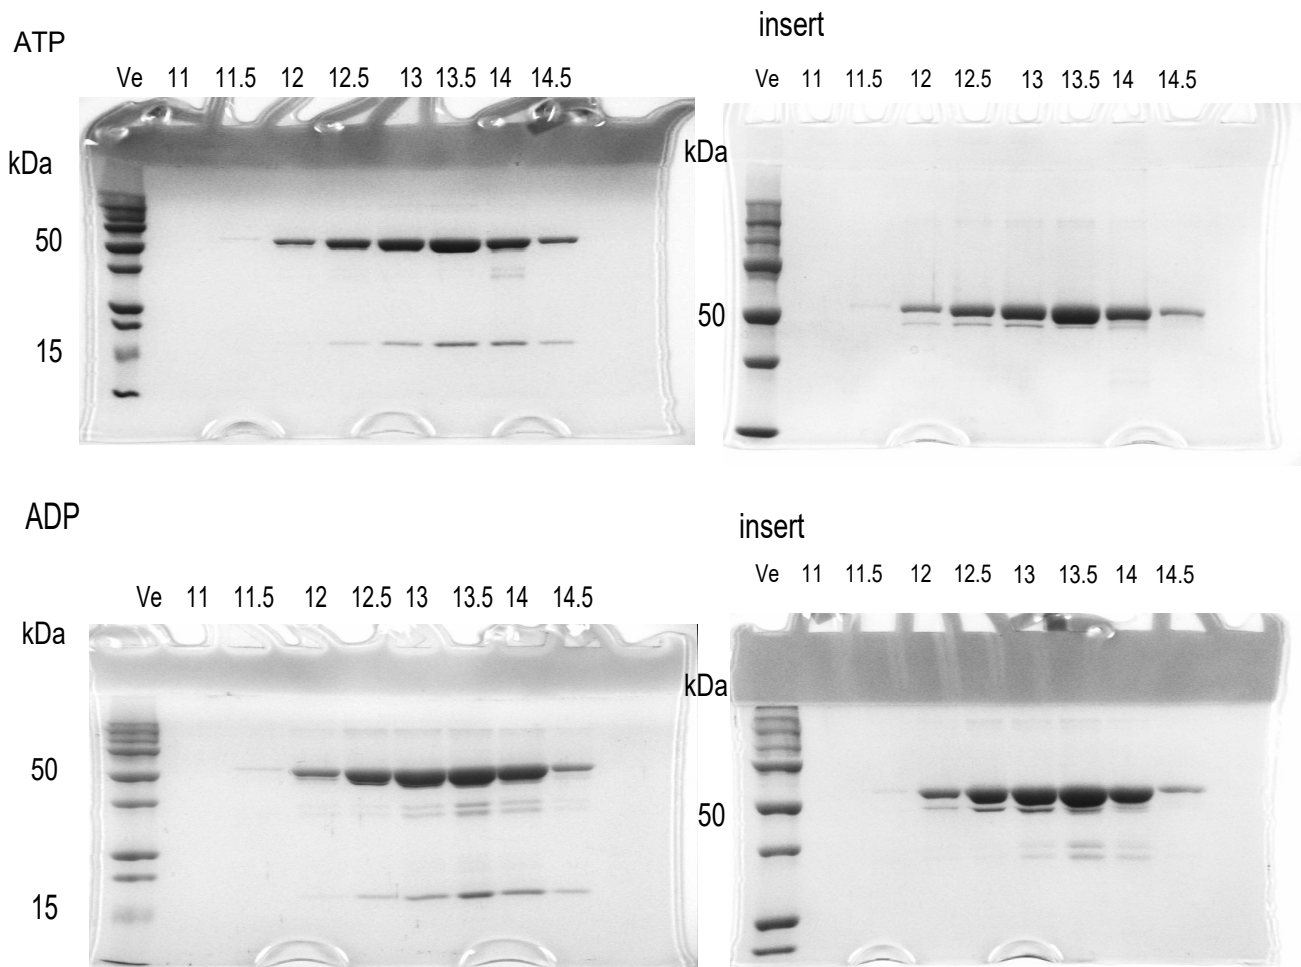

Supplementary Figure 14. Uncropped gels of Supplementary Figure 8b

**Table S1. BioSAXS data collection and scattering-derived parameters.**

|                                                                   |                                                          |
|-------------------------------------------------------------------|----------------------------------------------------------|
| Data collection parameters                                        |                                                          |
| Beam line                                                         | G1 Station of the Cornell High Energy Synchrotron Source |
| Beam geometry                                                     | Beam size: 250 $\mu\text{m}$ x 250 $\mu\text{m}$         |
| Wavelength ( $\text{\AA}$ )                                       | 1.267                                                    |
| Camera distance (mm)                                              | 1470                                                     |
| Exposure time (s)                                                 | 2                                                        |
| Temperature (K)                                                   | 295                                                      |
| Structural parameters                                             |                                                          |
| $I_0$ ( $\text{cm}^{-1}$ ) (from Guinier)                         | 0.0298                                                   |
| $R_g$ ( $\text{\AA}$ ) (from Guinier)                             | 54.9                                                     |
| $I_0$ ( $\text{cm}^{-1}$ ) (from P(r))                            | 0.0298                                                   |
| $R_g$ ( $\text{\AA}$ ) (from P(r))                                | 55.9                                                     |
| $D_{\text{max}}$ ( $\text{\AA}$ )                                 | 195                                                      |
| Molecular mass determination                                      |                                                          |
| Experimental Mw using a volume of correlation (kDa)               | 258.5                                                    |
| Calculated Mw from sequence (kDa)                                 | 266                                                      |
| Software employed                                                 |                                                          |
| Primary data processing                                           | BioXTAS RAW                                              |
| Ab initio analysis, validation and averaging                      | DAMMIF/DAMAVR                                            |
| # of modeling iteration                                           | 10                                                       |
| $\chi^2$ of ab initio model                                       | 0.991                                                    |
| DAMAVR NSD                                                        | 0.74 $\pm$ 0.083                                         |
| Computation of model intensities                                  | CRYSOL                                                   |
| Comparison of theoretical profile with experimental data $\chi^2$ | 1.093                                                    |
| Three dimensional graphics representations                        | Chimera                                                  |
